# Supplementary material for: Transcriptome Tomography for Brain Analysis in the Web-Accessible Anatomical Space
Source: PLoS One. 2012 Sep 19;7(9):e45373. doi: 10.1371/journal.pone.0045373 (PMC3446890; doi:10.1371/journal.pone.0045373)
Supplement: Table S2 — B* areas and regionally expressed genes. (XLS) [file pone.0045373.s003.xls]

## Sheet: Bstar areas and genes
Table S2: B* areas and regionally expressed genes
					selected anatomical regions			variables
					macroscopic structure		sub-structure	intensity	variance (FDR)
		Gene symbol	Probe ID	nucleic acid ID	area #	anatomical name	B* area name	( I / i)	(V / v)
1	-	Fbxw13	A_52_P353541	NM_177598	1	CTX ISO	LS	i	V
2		Tshz2	A_52_P158431	NM_080455	1	CTX ISO	RS	I	V
3		Myl4	A_51_P413130	NM_010858	1	CTX ISO	(Cx) motor	I	V
4		1190003J15Rik	A_51_P389479	AK004470	1	CTX ISO	(Cx) cingulate	I	V
5		Col24a1	A_51_P408430	AK017266	2	CTXpl	OB anterior	i	V
6		Tmem40	A_51_P463060	NM_144805	2	CTXpl	OB posterior	I	V
7	-	Dtl	A_52_P14686	NM_029766	2	CTXpl	Pir	I	V
8		Tcfl5	A_52_P299713	NM_178254	2	CTXpl	Tu	i	V
9		Figf	A_51_P117739	NM_010216	2	CTXpl	ventral Sb	i	V
10		Spink8	A_51_P458638	NM_183136	2	CTXpl	CA(1)	I	V
---					2	CTXpl	CA2/CA3
11		Dsp	A_51_P101460	AK077574	2	CTXpl	DG	i	V
---					2	CTXpl	A anterior
12	-	Met	A_52_P656418	TC1481553	2	CTXpl	A posterior	I	V
---					3	CNU	GP
13		Gprin3	A_51_P300324	AK173336	3	CNU	CPu lateral	i	V
14	-	4930486G11Rik	A_52_P630276	NM_175213	3	CNU	CPu medial	i	V
15		Slitrk6	A_51_P503822	NM_175499	4	TH	MD	I	V
---					4	TH	VA/ VL
---					4	TH	VPM/ VPL
16		Adarb2	A_52_P105429	NM_052977	4	TH	LG	I	V
17	-	1700110M21Rik	A_51_P367554	AK007164	4	TH	MG	i	V
18		Gpr151	A_51_P240703	NM_181543	4	TH	Hb	i	V
19		Foxb1	A_52_P345229	NM_022378	5	HY	M	i	V
20		Fzd5	A_52_P224125	XM_622260	5	HY	ME	i	V
21	-	Six3	A_51_P187561	D83144	5	HY	SCＮ	i	V
22		Prlr	A_51_P264673	AK083198	5	HY	MPA	i	V
23		Thbd	A_51_P291417	NM_009378	5	HY	SO	I	V
24		Ucn3*	A_51_P342327	NM_031250	5	HY	Pa	i	V
---					5	HY	Spa ventral
25		Nr0b1	A_51_P106455	NM_007430	5	HY	SPa dorsal	i	V
26		Hcrt	A_51_P308931	NM_010410	5	HY	DM	I	V
27		Fezf1*	A_51_P347619	AK014242	5	HY	VMH	i	V
28		Ghrh	A_51_P108428	NM_010285	5	HY	Arc	i	V
29		Lhx8	A_52_P508827	NM_010713	5	HY	LH	i	V
30		Nek2*	A_51_P501018	NM_010892	6	CB	(Cb) vermis	i	V
31		Bmp5	A_51_P516637	NM_007555	6	CB	(Cb) lobe	i	V
32	-	Agtr2	A_51_P437978	NM_007429	6	CB	(Cb) nucleus	i	V
33		Ucn	A_51_P255952	NM_021290	7	MB and HB	PAG	i	V
34		Pax7	A_51_P295131	NM_011039	7	MB and HB	SC	i	V
35		Tcfap2d	A_51_P398833	NM_153154	7	MB and HB	IC	i	V
36		Foxa1	A_51_P417643	NM_008259	7	MB and HB	VTA	i	V
37		Chrna6*	A_51_P499653	NM_021369	7	MB and HB	SN	i	V
38		Slc6a2	A_52_P98614	NM_009209	7	MB and HB	Tg	i	V
39		Cdh23	A_52_P416341	NM_023370	7	MB and HB	Pn	i	V
40		Hoxb3	A_51_P460643	NM_010458	7	MB and HB	MVe	i	V
---		no gene nominated
-		no ABA 3D map available
*		selected from the second candidate set of regionally expressed genes in BrainStars analyses
area #		seen in Figure 2B and C
Macroscopic structure anatomical name: Appendix 2, Allen Reference Atlas in http://mouse.brain-map.org/pdf/Allen_Reference_Atlases.pdf,
( )		used in the brainStars website, but not in this paper
Abbreviations are as follows;
A: amygdala/ amygdaloid complex; Arc: arcuate hypothalamic nucleus; CA: Ammon's Horn; CB: cerebellum; CNU: Cerebral nuclei; CPu: caudate putamen; CTX/Cx: cerebral cortex; CTXISO: Isocortex; CTXpl: Cortical plate; DG: dentate gyrus; DM: dorsomedial hypothalamic nucleus; GP: globus pallidus; HB: hindbrain; Hb: habenular nucleus; HY: Hypothalamus; IC: inferior colliculus; LG: lateral geniculate body…
VPM/VPL: ventral posterolateral thalamic nucleus / ventral posteromedial thalamic nucleus; VTA: ventral tegmental area.
